# Supplementary material
Source: PubMed Central journal article supplement (PMC2963335)
Supplement: supp_M110.108175_Supptable.pdf [file supp_M110.108175_Supptable.pdf]

**Table S1.** Oligonucleotide sequences used in this work

| <b>siRNA</b>                      |              |                                              |
|-----------------------------------|--------------|----------------------------------------------|
| ANGPTL4 siRNA                     | sense        | 5'-AAAGCTGCAAGATGACCTCAGATGGAGGCTG-3'        |
|                                   | anti-sense   | 5'-AAAAGGCTTAAGAAGGGAATCTTCTGGAAGAC-3'       |
| Control siRNA                     | sense        | 5'-AAAGCTGTCTTCAAGATTGATATCGAAGACTA-3'       |
|                                   | anti-sense   | 5'-AAAATAGTCTTCGATATCAAGCTTGAAGACA-3'        |
| <b>Real-time qPCR<sup>a</sup></b> |              |                                              |
| Human ANGPTL4                     | forward      | 5'-CTCCCGTTAGCCCCTGAGAG-3'                   |
|                                   | reverse      | 5'-AGGTGCTGCTTCTCCAGGTG-3'                   |
|                                   | Taqman probe | 5'-(6-FAM)ACCCTGAGGTCCTTCACAGCCTGC(TAMRA)-3' |
| Mouse ANGPTL4                     | Forward      | 5'-GCTTTGCATCCTGGGACGAG-3'                   |
|                                   | Reverse      | 5'-CCCTGACAAGCGTTACCACAG-3'                  |
|                                   | Taqman probe | 5'-(6-FAM)ACTTGCTGGCTCACGGGCTGCTAC(TAMRA)-3' |
| L27                               | Forward      | 5'-CTGGTGGCTGGAATTGACCGCTA-3'                |
|                                   | Reverse      | 5'-CAAGGGGATATCCACAGAGTACCTTG-3'             |
|                                   | Taqman probe | 5'-(HEX)CTGCCATGGGCAAGAAGAAGATCGCC(BHQ1)-3'  |

<sup>a</sup> Melting curve analysis was performed to assure that only one PCR product was formed. Primers were designed to generate a PCR amplification product of 100 to 250 bp. Only primer pairs yielding unique amplification products without primer dimer formation were subsequently used for real-time PCR assays.
