# Supplementary material
Source: PubMed Central journal article supplement (PMC2963335)

A

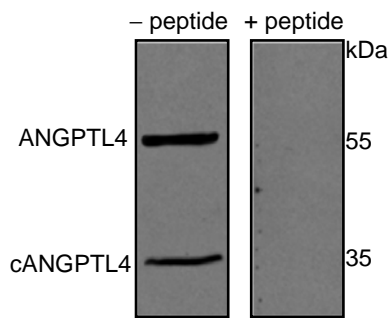

B

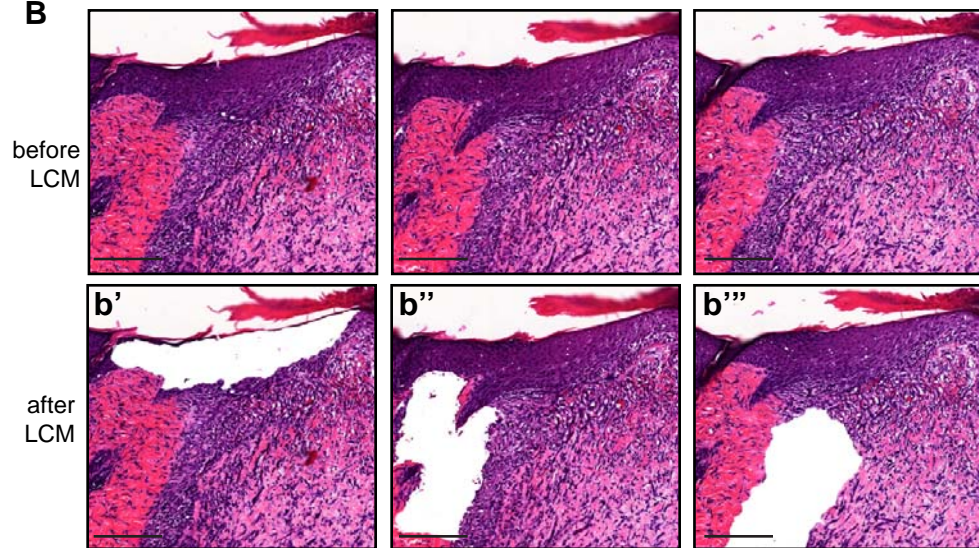

C

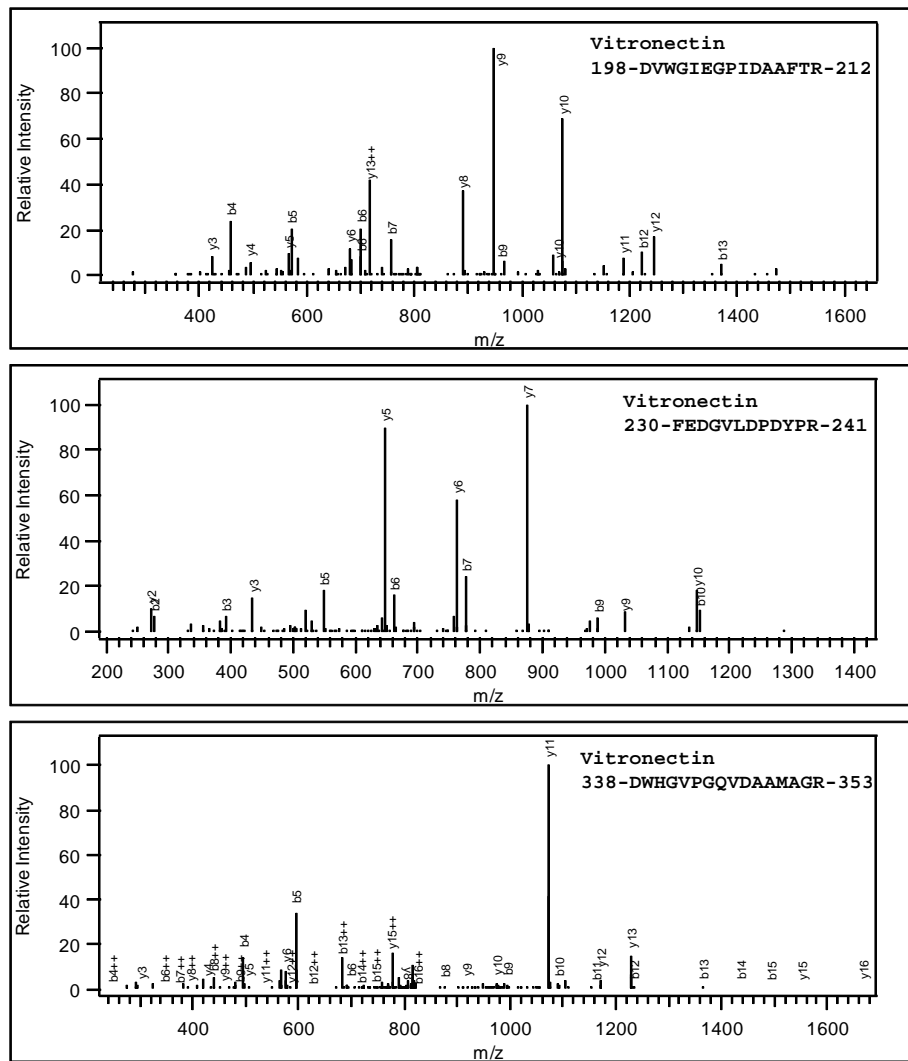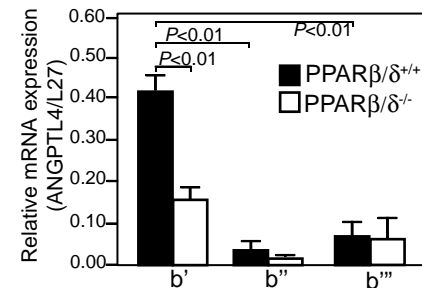

D

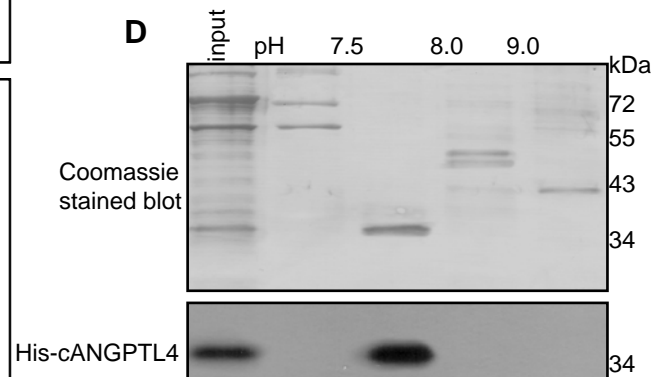

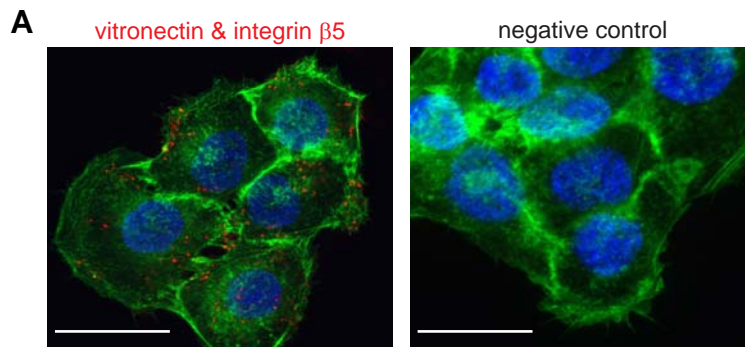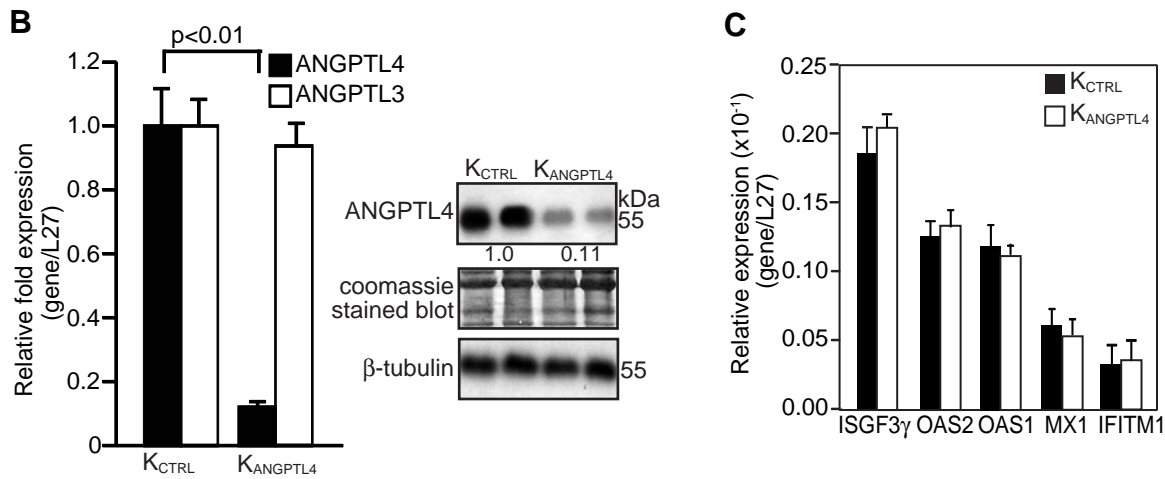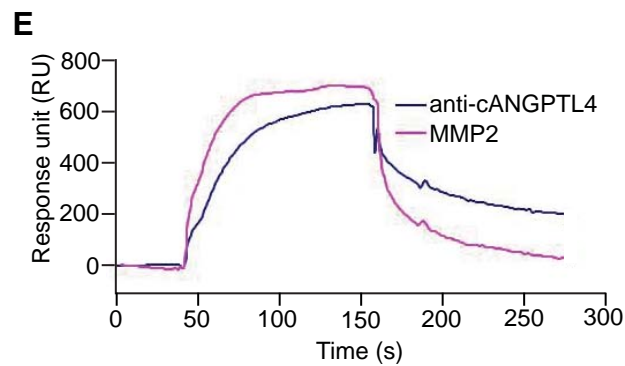

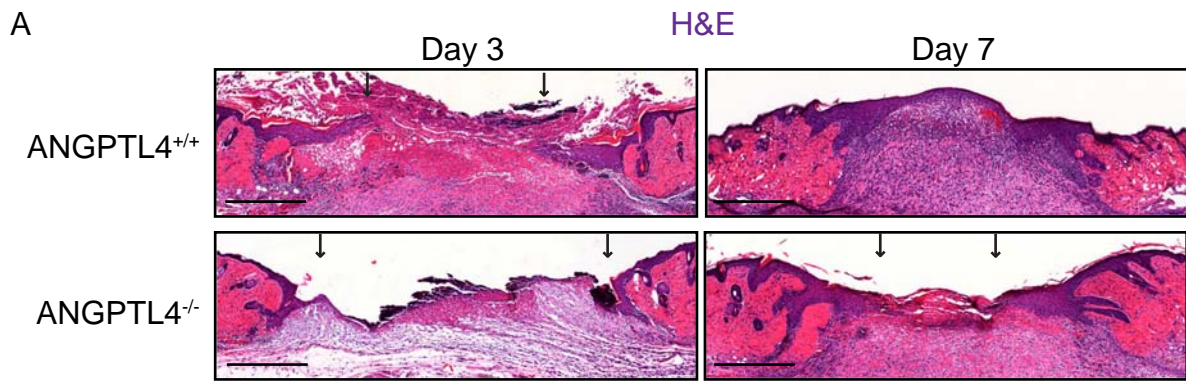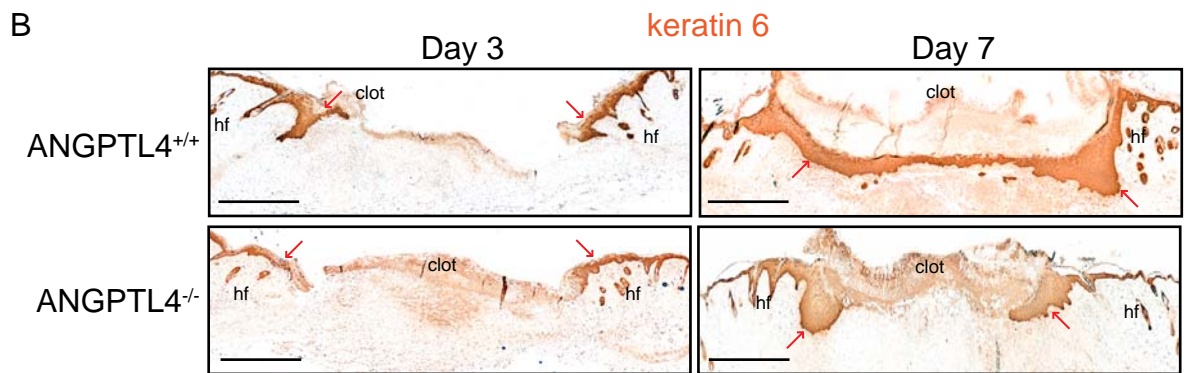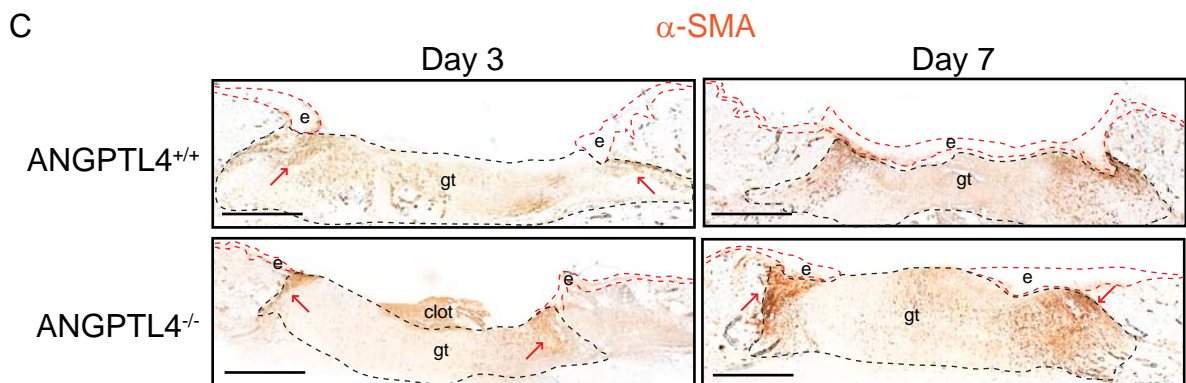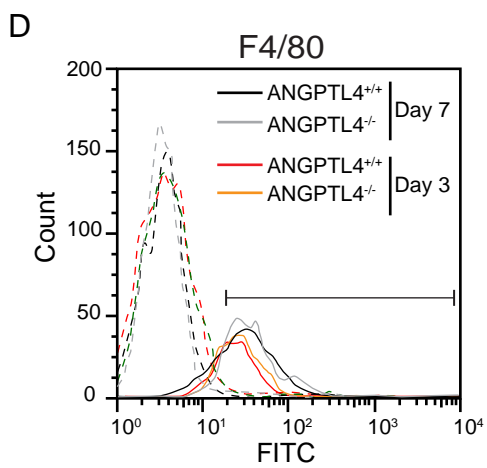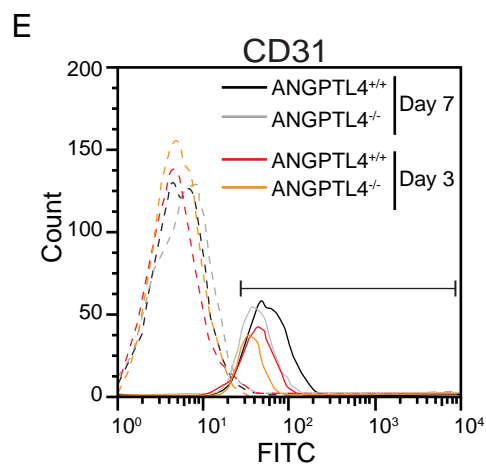

Supplement: supp_M110.108175_figur.pdf [file supp_M110.108175_figur.pdf]
